# Supplementary material
Source: publisher site journal article supplement (https://www.dovepress.com/get_supplementary_file.php?f=332725.docx)
Supplement: Supplementary file 1 [file get_supplementary_file.php]

**Supplementary Table 1: Multivariate logistic regression model analyzed the different variables for patients with small cell lung cancer and combined small cell lung cancer.**

| **Variables** | **SCLC** | **C-SCLC** |
| --- | --- | --- |
| **N metastasis** |  |  |
| OR (95%CI) | Reference | 0.555 (0.439-0.703) |
| *P* |  | < 0.001 |
| **Bone metastasis** |  |  |
| OR (95%CI) | Reference | 0.796 (0.601-1.055) |
| *P* |  | 0.112 |
| **Brain metastasis** |  |  |
| OR (95%CI) | Reference | 0.792 (0.580-1.082) |
| *P* |  | 0.143 |
| **Liver metastasis** |  |  |
| OR (95%CI) | Reference | 0.591 (0.448-0.779) |
| *P* |  | < 0.001 |
| **Lung metastasis** |  |  |
| OR (95%CI) | Reference | 1.109 (0.812-1.517) |
| *P* |  | 0.515 |
